# Supplementary material
Source: Springer Nature journal article supplement (https://www.springermedizin.de/resource/supplementary/12889_2007_882_MOESM1_ESM.pdf/9501984)

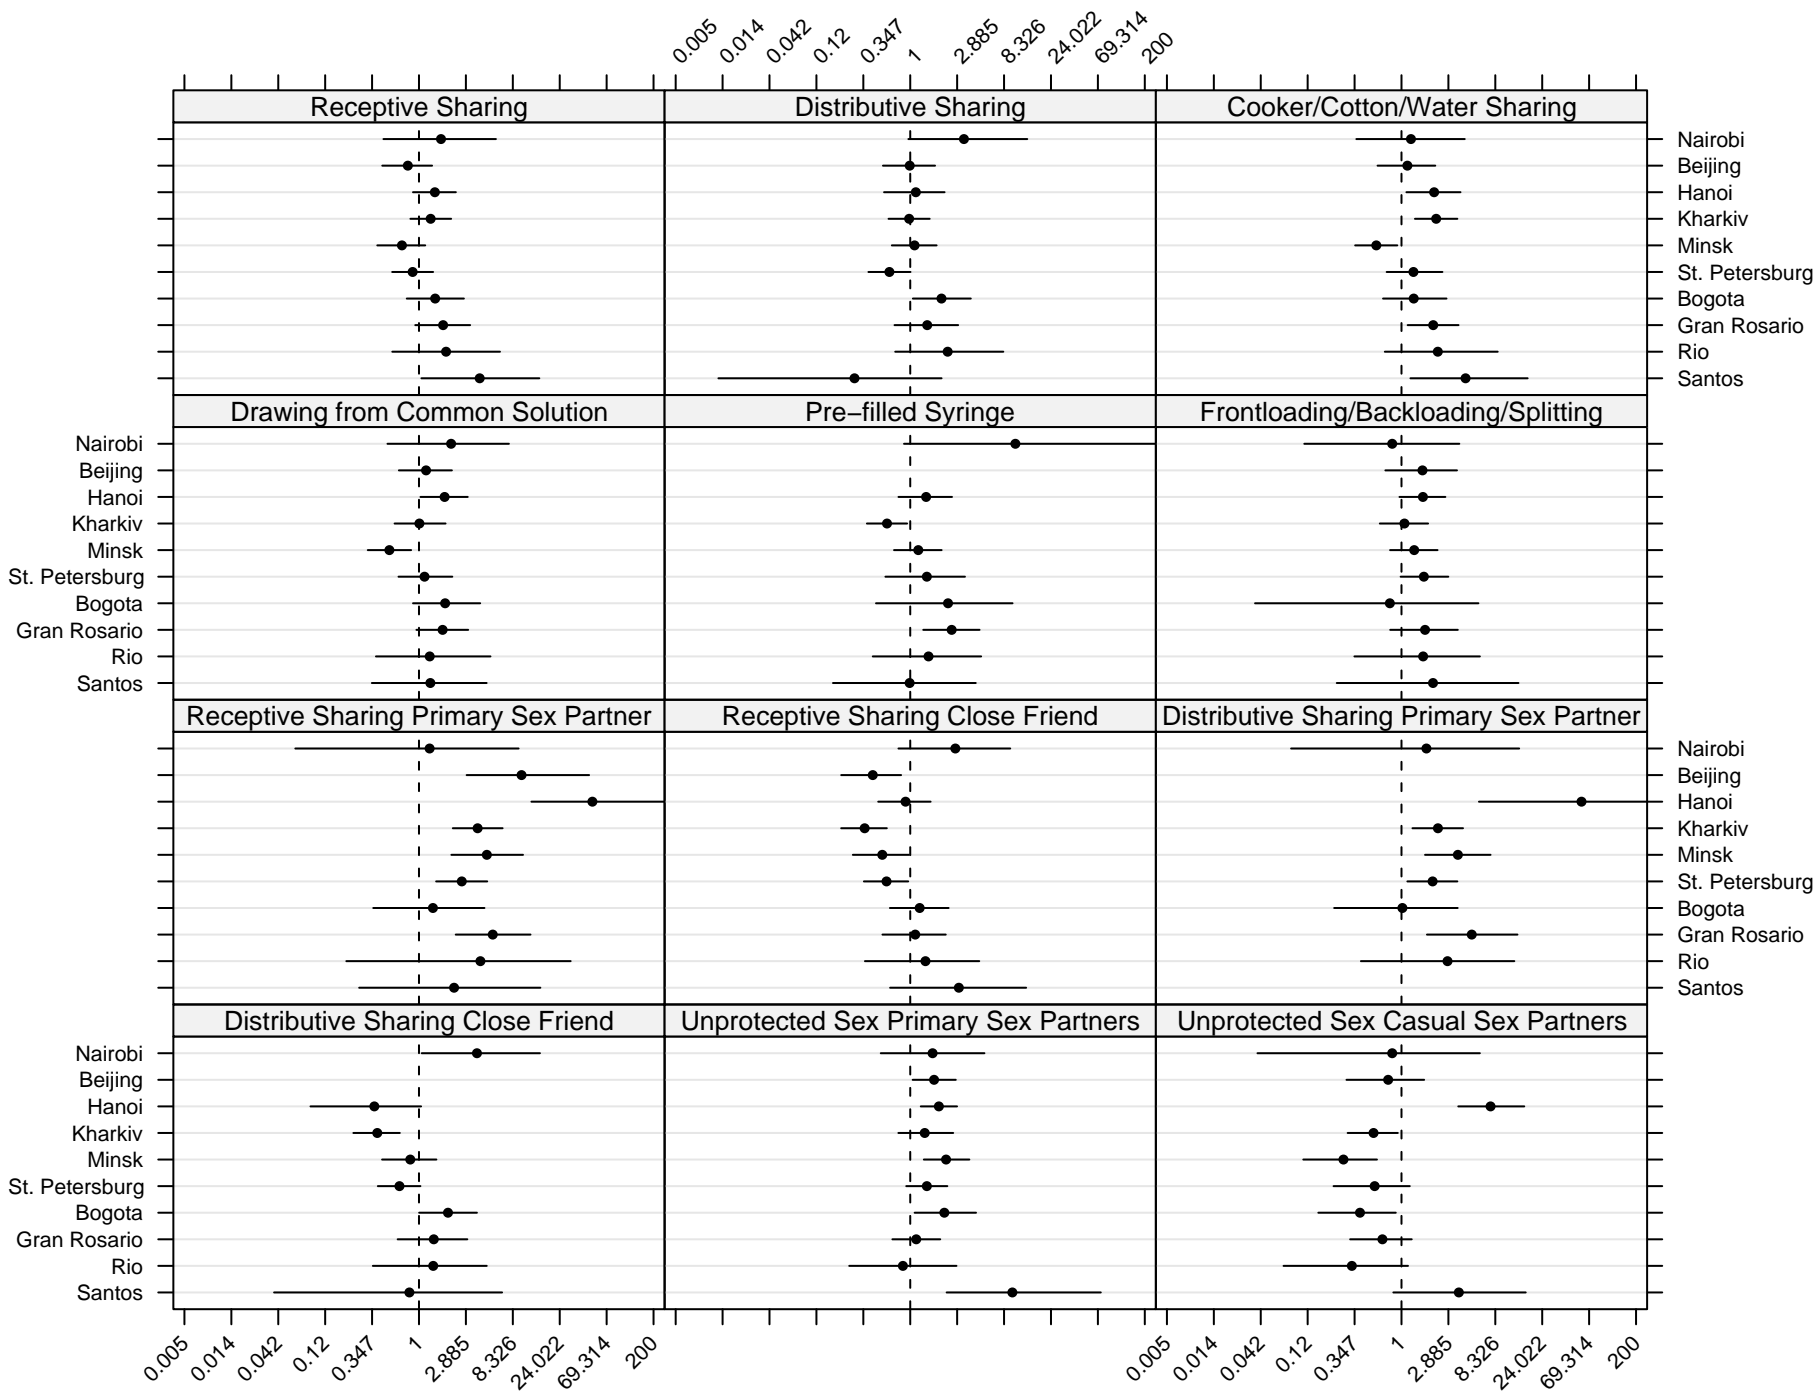

95% Confidence Intervals for Adjusted Odds Ratios

Supplement: MOESM1 [file 9501984]
